# Supplementary material
Source: PubMed Central journal article supplement (PMC3826083)
Supplement: NIHMS54891-supplement-sup_info.pdf [file NIHMS54891-supplement-sup_info.pdf]

## Supporting Information

### Robust red FRET sensors using self-associating fluorescent domains

Laurens H. Lindenburg, Anne. M. Hessels, Eduard H.T.M. Ebberink, Remco Arts and Maarten Merkx\*

\*Corresponding author:

Laboratory of Chemical Biology, Department of Biomedical Engineering, Eindhoven University of Technology, P.O. Box 513, 5600 MB, Eindhoven, The Netherlands. M.MERKX@TUE.NL

Table of contents:

|                            |                                                                                                                                           |        |
|----------------------------|-------------------------------------------------------------------------------------------------------------------------------------------|--------|
| <b>Supporting Methods</b>  | Description of the cloning and mutagenesis of genetic constructs used in this study<br>Description of protein expression and purification | p. S2  |
| <b>Supporting Figure 1</b> | Schematic overview of mutational CPEC strategy                                                                                            | p. S4  |
| <b>Supporting Table 1</b>  | Overview of primers used in mutational CPEC to generate library of mOrange-linker-mCherry variants                                        | p. S5  |
| <b>Supporting Table 2</b>  | Overview of other primers used for cloning and site-directed mutagenesis                                                                  | p. S6  |
| <b>Supporting Figure 2</b> | Nucleotide and amino acid sequence of the mOrange-L9-mCherry ORF in bacterial expression vector pET28a                                    | p. S7  |
| <b>Supporting Figure 3</b> | Nucleotide and amino acid sequence of the redCALWY-1 ORF in bacterial expression vector pET28a                                            | p. S9  |
| <b>Supporting Figure 4</b> | Nucleotide and amino acid sequence of the redCALWY-4 ORF in mammalian expression vector pGen2.1                                           | p. S11 |
| <b>Supporting Figure 5</b> | Additional redCALWY measurements in HeLa cells                                                                                            | p. S13 |
| <b>Supporting Figure 6</b> | Additional redCALWY measurements in HEK293 cells                                                                                          | p. S13 |

## Supporting Methods

**Cloning and mutagenesis.** A synthetic construct encoding for mOrange-linker-mCherry inserted in a pUC57 cloning vector was ordered (Genscript, USA). Circular polymerase extension cloning (CPEC)<sup>1</sup> was used to clone the DNA encoding for this construct from pUC57 to the bacterial expression vector pET28a (Novagen), creating pET28a-mOrange-L9-mCherry. Briefly, primers mOrange\_F and Streptag\_R (Supporting Table 2) were used to amplify mOrange-linker-mCherry, while primers Strptg\_dwmsvec and mOrange\_throm were used to amplify and linearize pET28a (Novagen), using high-fidelity DNA polymerase (Phusion, NEB). Primers were designed to incorporate overlapping ends in the PCR fragment, allowing the subsequent CPEC reaction. A CPEC-based mutational strategy was also used to introduce the various combinations of reversions R125I, V127T and T180I (numbering relative to DsRed) in one or both of the fluorescent domains. PCR fragments were generated using primers (Supporting Table 1) that introduced one or more of the desired reversions at the ends of fragments. Fragments were then combined and circularized using CPEC (Supporting Figure 1). To produce single mCherry domains for the intermolecular dimerization studies, site-directed deletion mutagenesis was carried out using a modification of a previously published mutagenesis technique, allowing a one-step 913 bp deletion of DNA encoding mOrange and linker<sup>2</sup>. To generate pET28a-mCherry, a primer pair (del\_mOrange\_R and del\_mOrange\_F) was designed with complementary 5'- and 3'-ends, ensuring amplification of the entire expression plasmid except the part encoding mOrange and linker. To produce the pET28a-LSSmOrange-L9-mCherry constructs, we introduced LSSmOrange-specific mutations<sup>3</sup> using a mutational CPEC strategy with primer pairs A44V\_R & G196D\_F, A44V\_F & F83L\_R, F83L\_F & W143M\_R, W143M\_F & I161D\_M163L\_R and I161D\_M163L\_F & G196D. To produce the bacterial expression vectors pET28a-redCALWY-1 and pET28a-redCALWY-4, the ATOX-L9-WD4 insert was amplified from pET28a-eCALWY-1 or pET28a-eCALWY-4 using primers Ins\_redeCalwy\_F and Ins\_redeCalwy\_R. In parallel, pET28a-mOrange-L9-mCherry was PCR-linearized using primers Vec\_redeCalwy\_F and Vec\_redeCalwy\_R and insert and vector were combined using CPEC. To produce the pGen2.1-redCALWY-4 mammalian expression construct, we took as starting template pGen2.1-mOrange2(R125I)-linker-mCherry (R125I), a vector bearing a synthetic mammalian expression construct (Genscript), restricted it with *KpnI* and *BspEI* and ligated it to an insert cut from peCALWY-4<sup>4</sup> with the same restriction enzymes. pGen2.1-redCALWY-

1 was generated by reverting the cysteine-to-serine mutation of the third cysteine of the WD4 domain in pGen2.1-redCALWY-4 back to a cysteine using primers WD4\_S\_to\_C3\_F and WD4\_S\_to\_C3\_R. Primers RCS\_mOr2\_I125R\_F and RCS\_mCh\_I125R\_F were used to introduce the I125R mutations in pGen2.1-redCALWY-4. All plasmids were confirmed by sequencing prior to use.

**Protein expression and purification.** *E. coli* BL21(DE3) transformed with expression plasmid was grown to OD<sub>600</sub> in 500 mL (for the red protease constructs) or 2 L (for the redCALWY constructs) Lysogeny Broth (LB) medium containing 50 µg/mL kanamycin in a shaking incubator at 37 °C. Following induction with 0.1 mM IPTG, the bacterial cultures were grown overnight at 25 °C. Cells were harvested by centrifugation and lysed using 10 mL BugBuster Protein Extraction reagent (Novagen) with 10 µL Benzonase. Proteins were purified by Ni-NTA affinity chromatography and were subsequently loaded onto a size exclusion column (Sephacryl S200, GE Healthcare). The SEC fractions were analyzed by SDS PAGE for correct size and purity, pooled and concentrated using 10 kDa MWCO centrifugation filters. The single domain mCherry constructs used for anisotropy studies were purified by Ni-NTA chromatography only, as SDS-PAGE revealed this single purification step to result in sufficient purity of these constructs. Since His-tags are known to readily bind zinc<sup>5</sup>, they were removed from all Zn<sup>2+</sup>-sensor constructs using thrombin cleavage. After elution from the Ni-NTA column, the buffer was exchanged to thrombin cleavage buffer (20 mM Tris-HCl (pH 8.4), 150 mM NaCl, 2.5 mM CaCl<sub>2</sub>) using PD10 desalting columns (GE, Healthcare). Cleavage of the thrombin recognition site between the His-tag and the mOrange N-terminus was initiated by the addition of 0.3 U thrombin protease (Novagen) per mg target protein at a 0.2 mg/mL target protein concentration. Cleavage was carried out at 4 °C for 20 hours, after which 1 mM phenylmethylsulfonyl fluoride (PMSF, Sigma) was added to inactivate the thrombin enzyme. Proteins were then loaded onto Ni-NTA once again. Elution of protein without a His-tag from the Ni-NTA required a buffer containing 30 mM imidazole, presumably due to a weak affinity of the WD4 and/or ATOX1 domain for Ni-NTA, as previously noted for Wilson disease proteins<sup>6</sup>. Uncleaved protein remained behind on the Ni-column at this imidazole concentration. The red Zn<sup>2+</sup> sensor proteins were subsequently further purified by SEC chromatography. The SEC fractions were analyzed by SDS PAGE for correct size and purity, pooled and concentrated using 10 kDa MWCO centrifugation filters.

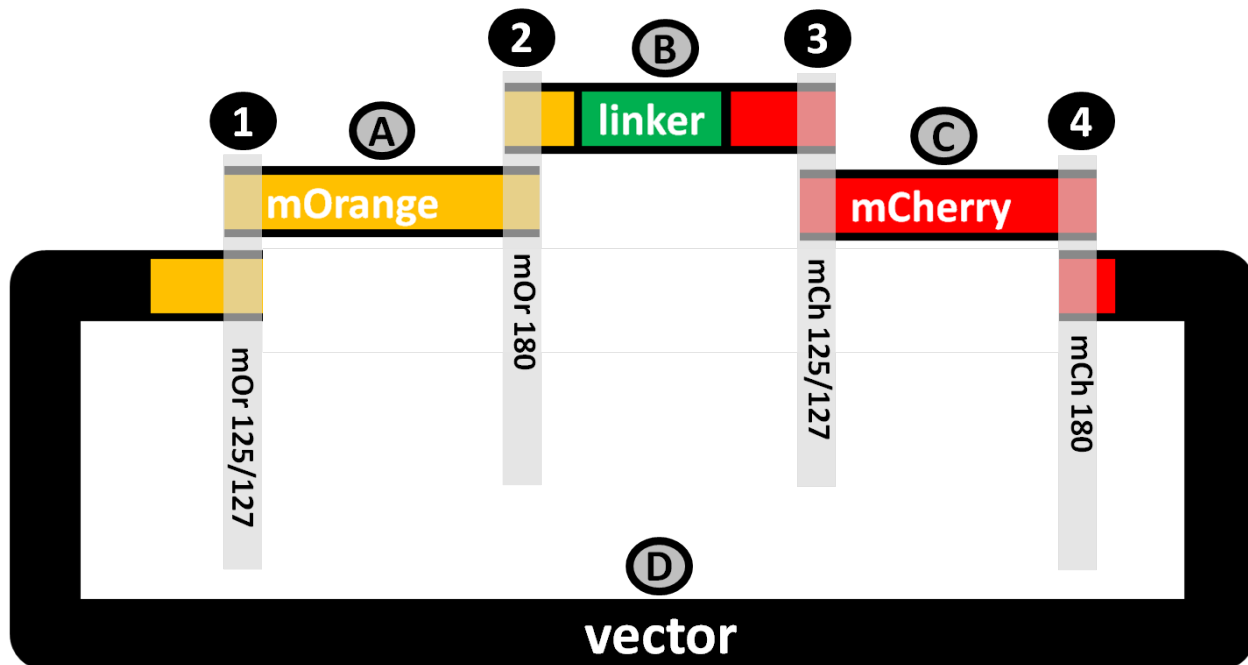

**Supporting Figure 1.** Schematic overview of mutational CPEC strategy. In order to introduce mutations at four different positions in the mOrange-linker-mCherry protease sensor simultaneously, a mutational CPEC strategy was followed. At each of the positions, mOrange 125/127, mOrange 180, mCherry 125/127 and mCherry 180 (labeled 1 to 4 respectively), primers were designed to allow amplification of four different fragments (labeled A, B, C and D). Primers were designed to incorporate different mutations into the ends of PCR fragments in such a way that both ends of each fragment overlapped with the ends of adjacent fragments, with a melting temperature of about 72 °C (calculated using Thermo Scientific's online Tm tool (<http://www.thermoscientificbio.com/webtools/tmc/>)). These fragments were subsequently recombined in a CPEC reaction, at equimolar concentration and 200 ng of vector fragment D. The primers used at positions 1 to 4, as well as the mutations they were designed to introduce, are listed in Table S1.

**Supporting Table 1.** Overview of primers used in mutational CPEC to generate small library of mOrange-linker-mCherry variants.

Each primer is designed to introduce a mutation at a location indicated schematically in Supporting Figure 1.

| Mutation            | Position/Fragment | Primer orientation | Sequence (5'-->3')                             | primer number |
|---------------------|-------------------|--------------------|------------------------------------------------|---------------|
| mOrange R125I       | 1/D               | anti-sense         | CGGAAAGTTAGTGCCAATCAGCTTCAC                    | 1             |
| mOrange R125I/T127V | 1/D               | anti-sense         | CGGAAAGTTA <b>ACGCCAAT</b> CAGCTTCAC           | 2             |
| mOrange T127V       | 1/D               | anti-sense         | GGAAAGTTA <b>ACGCCGCGCAGC</b>                  | 3             |
| none                | 1/D               | anti-sense         | GGAAAGTTAGTGCCGCGCAGC                          | 4             |
| mOrange R125I       | 1/A               | sense              | GTGAAGCTG <b>ATTGGCACTAACTTTCCG</b>            | 5             |
| mOrange R125I/T127V | 1/A               | sense              | GTGAAGCTG <b>ATTGGCGTTAACTTTCCG</b>            | 6             |
| mOrange T127V       | 1/A               | sense              | GCTGCGGG <b>CGTTAACTTTCC</b>                   | 7             |
| none                | 1/A               | sense              | GCTGCGGGCACTAACTTTCC                           | 8             |
| mOrange T180 (WT)   | 2/A               | anti-sense         | GGCTTTGTAGGTGGTTTTAACTTCAGAGG                  | 9             |
| mOrange T180I       | 2/A               | anti-sense         | GGCTTTGTAGATGGTTTTAACTTCAGAGGTG                | 10            |
| none                | 2/B               | sense              | CCTCTGAAGTAAAACCACTACAAAGCC                    | 11            |
| mOrange T180I       | 2/B               | sense              | CACCTCTGAAGTAAAACCACTACAAAGCC                  | 12            |
| mCherry R125I       | 3/B               | anti-sense         | CAGACGGGAAGTTAGTACCA <b>ATCAGTTTTACTTTATAG</b> | 13            |
| mCherry R125I/T127V | 3/B               | anti-sense         | CAGACGGGAAGTTA <b>ACACCAATCAGTTTTACTTTATAG</b> | 14            |
| mCherry T127V       | 3/B               | anti-sense         | CGGGAAGTTA <b>ACACCACGCAGTTTTACTTTATAG</b>     | 15            |
| mCherry T127V       | 3/B               | anti-sense         | CGGGAAGTTAGTACCACGCAGTTTTACTTTATAG             | 16            |
| mCherry R125I       | 3/C               | sense              | CTATAAAGTAAA <b>ACTGATTGGTACTAACTTCCCGTCTG</b> | 17            |
| mCherry R125I/T127V | 3/C               | sense              | CTATAAAGTAAA <b>ACTGATTGGGTAACTTCCCGTCTG</b>   | 18            |
| mCherry T127V       | 3/C               | sense              | CTATAAAGTAAA <b>ACTGCGTGGTAACTTCCCG</b>        | 19            |
| none                | 3/C               | sense              | CTATAAAGTAAA <b>ACTGCGTGGTAACTTCCCG</b>        | 20            |
| none                | 4/C               | anti-sense         | CGCTTTGTACGTGGTTTTCACTTCC                      | 21            |
| mCherry T180I       | 4/C               | anti-sense         | GCTTTGTAGATGGTTTTCACTTCCGC                     | 22            |
| none                | 4/D               | sense              | GGAAGTGAAAACCACTACAAAGCG                       | 23            |
| mCherry T180I       | 4/D               | sense              | GCGGAAGTGAAAACCACTACAAAGC                      | 24            |

**Supporting Table 2.** Overview of other primers used for cloning and site-directed mutagenesis.

| Name             | Sequence (5'-->3')                                   |
|------------------|------------------------------------------------------|
| Strptg_dwmsvec   | GTCCCATCCGAGTTCGAGAAATAAGCTGAGCAATAACTAGCATAACCCCTTG |
| mOrange_F        | ATGGTGAGCAAAGGTGAGGAAAAC                             |
| Streptag_R       | TTATTCTCGAACTGCGGATGGGAC                             |
| mOrange_throm    | GTTTTCTCACCTTTGCTACCATATGGCTGCCGCGCGG                |
| del_mCherry_F    | CGAACTGTATAAATAAGCTGAGCAATAACTAGCATAACCCCTTGGGGCC    |
| del_mOrange_R    | GTCCTCTCGCCCTTAGAAACCATATGGCTGCCGCGCG                |
| del_mOrange_F    | GTTTCTAAGGGCGAAGAGGACAATATGGCTATCATCAAAGAGTTCATGCG   |
| del_mCherry_R    | GTTATTGCTCAGCTTATTTATACAGTTCGTCCATACCGCCAGTAGAATGACG |
| A44V_F           | TTCCAGACTGTAAACTGAAGGTGACCAAAGGCGG                   |
| A44V_R           | ACCTTCAGTTAACAGTCTGGAAGCCCTCATACGG                   |
| F83L_F           | TCCCGATTATTTAAACTGTCATTCCCGGAAGGCTTCAAATG            |
| F83L_R           | GACAGTTTTAAATAATCGGGGATATCTGCAGGGTGTTTAACATACGCCTTG  |
| W143M_F          | ACTATGGGCATGGAAGCTTCTCTGAACGTATGTATCCG               |
| W143M_R          | GAAGCTTCCATGCCCATAGTCTTTTTCTGCATAACCG                |
| I161D&M160L_mOrF | GGTGAGGACAAACTGCGTCTGAAGCTGAAAGATGGC                 |
| I163D&M160L_mOrR | GACGCAGTTTGCCTCACCTTTACGCGCGCC                       |
| G196D_F          | TGCTTACATTGTAGATATTAATACTGGATATCACGAGCCATAACGAG      |
| G196D_R          | CCAGTTTAATATCTACAATGTAAGCACCCGCGCAGTTG               |
| Vec_redeCalwy_F  | TTCAGTCTCGGTACCGATGGTTTCTAAGGGCGAAGAGGACA            |
| Vec_redeCalwy_R  | GCATTCCGGATTTATACAGTTCGTCCATACCGCCAG                 |
| Ins_redeCalwy_F  | GGACGAACTGTATAAATCCGGAATGCCGAAGCAC                   |
| Ins_redeCalwy_R  | TTAGAAACCATCGGTACCGAGACTGAAGCCTCAAATC                |
| WD4_S_to_C3_F    | ATGACCTGTGCATCCTGTGCCATTCCATTG                       |
| WD4_S_to_C3_R    | CACAGGATGCACAGGTCATGCCGGCAATGG                       |
| RCS_mOr2_I125R_F | CTATAAAGTAAACTGCGTGGTACGAATTTTCCCTCAGATGGACC         |
| RCS_mOr2_I125R_R | CGTACCACGCAGTTTTACTTTATAGATGAACTCCCCATCCTG           |
| RCS_mCh_I125R_F  | CAAGGTGAAGCTTAGAGGCACAACTTTCCAAGCGACG                |
| RCS_mCh_I125R_R  | GTGCCTTAAGCTTACCTTGTATATAAACTCGCCG                   |

```

1  atgggcagcagccatcatcatcatcatcaagcagcggcctgggtgccgcccggcagccat 60
   M G S S H H H H H H S S G L V P R G S H
61  atggtgagcaaaagtgaggaaaacaatatggcaatcattaagagtttatgcgcttcaag 120
   M V S K G E E N N M A I I K E F M R F K
121  gtccgatggaaggttctgtgaacggtcacgagttcgagattgaaggcgaggggtgaggg 180
   V R M E G S V N G H E F E I E G E G E G
181  cgtccgatgagggcttccagactgctaaactgaagtgaccaaaaggcgtcctctgccc 240
   R P Y E G F Q T A K L K V T K G G P L P
241  ttgcctgggatcctgtctccgcaattcacatagggccaaggcgtatgttaaacac 300
   F A W D I L S P Q F T Y G S K A Y V K H
301  cctgcggatccccggattatctcaactgtcctcccggaaggctcaaatgggagcgt 360
   P A D I P D Y F K L S F P E G F K W E R
361  gtaatgaacttcgagggcggcggcgtcgtaacgttaccaggactcctctctgcaggac 420
   V M N F E D G G V V T V T Q D S S L Q D
421  ggtgagtttattcaaaagtgaaagctgcggcactaactttcgtctgacggcctgggt 480
   G E F I Y K V K L R G T N F P S D G P V
481  atgcagaaaaagactatgggctgggaagcttctctgaaactatgtatccggaagacggc 540
   M Q K K T M G W E A S S E R M Y P E D G
541  ggctgaaaagtgagatcaaatgctgtgaaactgaaagatggcggcattacacctct 600
   A L K G E I K M R L K L K D G G H Y T S
601  gaagttaaaaccctcaaaagccaaaagccgggtacaactgccgggtgcttacattgtt 660
   E V K T T Y K A K K P V Q L P G A Y I V
661  ggtattaactggatcacagccataaacgaggattacacgattggtgaacagtaacgaa 720
   G I K L D I T S H N E D Y T I V E Q Y E
721  cgtgccgagggcccttacttactggcggatggacgaactgtataaaagaattcggcgg 780
   R A E G R H S T G G M D E L Y K E F G G
781  tccggcgaagcggcggatccggcggtagcggcggatccggcggctccggcggatccggc 840
   S G G S G G S G G S G G S G G S G G S G G S G
841  ggcagcggcggatccggcggtagcggcggatccggcggtagcggcggatccggcggaaagc 900
   G S G G S G G S G G S G G S G G S G G S G G S
901  ggtggatccggcggtagcggcggatccggcggtagtgaaaacctgtattccagtcgggt 960
   G S G S G G S G G S G G S S E N L Y F Q S G
961  ggttctggtggttctatggtttctaaggcgaagaggacaatatggctatcatcaaagag 1020
   G S G G S M V S K G E E D N M A I I K E
1021  ttcattgcttttaaaagtacacatggaaggctccgttaacggcgcagagtttgaattgaa 1080
   F M R F K V H M E G S V N G H E F E I E
1081  ggtgagggcgaaggtccgccgtaacgaaggcactcaaacggcgaagctgaaagtgacaaa 1140
   G E G E G R P Y E G T Q T A K L K V T K
1141  ggtggcccactgcggttcgcttgggacattctgtcccgcgaattcatgtacggttctaaa 1200
   G G P L P F A W D I L S P Q F M Y G S K
1201  ggcactgtaaacaccggcggatattccggattacctgaaactgtcttcccggaaggt 1260
   A Y V K H P A D I P D Y L K L S F P E G
1261  tcaaatgggaacgtggtatgaacttcgaagacgggtggtgtgtaacggctactcaggac 1320
   F K W E R V M N F E D G G V V T V T Q D
1321  tctagcctgcaggacggcgaatttatctataaaagtaaaactgcgtgggtactaaactcccg 1380
   S S L Q D G E F I Y K V K L R G T N F P
1381  tctgatggcccggttatgcaaaagaaaactatgggttggggaagcttctagcgaacgcats 1440
   S D G P V M Q K K T M G W E A S S E R M
1441  taccggaggacgggtgccctgaaaggtgaaatcaaacacgectgaaactgaaggacggc 1500
   Y P E D G A L K G E I K Q R L K L K D G
1501  ggccaactacgatcggaagtgaaaaccacgtacaagcgaagaaccagtacagctgcct 1560
   G H Y D A E V K T T Y K A K K P V Q L P
1561  ggtgctacaatgtgaatatcaaacggatattactccataacgaagactataccatc 1620
   G A Y N V N I K L D I T S H N E D Y T I
1621  gtcgaacagatgaacgtgctgaaggtcgccatagcaccggcggcatggatgagttatac 1680
   V E Q Y E R A E G R H S T G G M D E L Y
1681  aagctagcggctcgggtccacgcggtagccactgggtccatccgaggttcgagaaataa 1740
   K S S G L V P R G S H W S H P Q F E K -

```

**Supporting Figure 2.** Nucleotide and amino acid sequence of the mOrange-L9-mCherry ORF in bacterial expression vector pET28a. The DNA sequence is shown in lowercase, with the single letter amino acid code shown beneath each codon in uppercase. The His-tag is highlighted in dark yellow, the two thrombin cleavage sites (found in both the N- and the C-terminal regions) in green, mOrange in yellow, the linker (interrupted by a TEV cleavage site highlighted in turquoise) in bright green, mCherry in red, and the Strep-II tag in black. Positions that were subjected to mutagenesis to test for enhanced FP self-association, R125, T127 and T180, are highlighted in grey in both the mOrange and mCherry sequences. Positions that were mutated to convert mOrange to LSSmOrange, A44, F83, W143, I161, M163 and G196 are highlighted in dark blue.





1 atgggcagcagc catcatcatcatcatcac agcagcggc ctgggtgccgcggcggcagccat 60  
M G S S H H H H H H S S G L V P R G S H  
61 atgggtgagaaaaggtgaggaaaaacaatatggcaatcattaaagagtttatcggtttcaag 120  
M V S K G E E N N M A I I K E F M R F K  
121 gtcctgatggaaggttctgtgaacggtcacaggttcgagattgaagggcagggtgagggt 180  
V R M E G S V N G H E F E I E G E G E G  
181 cgtccgtatgagggctccagactgctaaactgaaggtgaccaaaggcgtcctctgccg 240  
R P Y E G F Q T A K L K V T K G G P L P  
241 ttccgctgggatctcgtctccgcaattcaatatgggtccaaggcgtatgttaaacac 300  
F A W D I L S P Q F T Y G S K A Y V K H  
301 cctgcggatattccggattattcaaaactgtccttcccgaaggcttcaaatgggagcgt 360  
P A D I P D Y F K L S F P E G F K W E R  
361 gtaatgaacttcaggacggcggcgtcgtaaccgttaccaggactcctctctgcaggac 420  
V M N F E D G G V V T V T Q D S S L Q D  
421 ggtgagtttattcaaaagtgaaagctgattggcactaacttccgtctgacggcgggt 480  
G E F I Y K V K L I G T N F P S D G P V  
481 atgcagaaaaagactatgggctgggaagcttccctgtaacgtatgtatccggaagacggc 540  
M Q K K T M G W E A S S E R M Y P E D G  
541 gcgctgaaaaggtgagatcaaaatgcgtctgaagctgaaagatggcggctattcacctct 600  
A L K G E I K M R L K L K D G G H Y T S  
601 gaagttaaaccactcaaaagccaaaagcgggtacaactgccgggtgcttacattggt 660  
E V K T T Y K A K K P V Q L P G A Y I V  
661 ggtattaaactggatcatcagagccataacgaggttacacgattgttgacagtagcagaa 720  
G I K L D I T S H N E D Y T I V E Q Y E  
721 cgtgcgagggcggcattcactcactggcgtatggacgaactgtataaatcccgaatgccg 780  
R A E G R H S T G G M D E L Y K S G M P  
781 aagcagagttctctgtggacatgacctgtggaggctgtgctgaagctgtctctcgggtc 840  
K H E F S V D M T C G G C A E A V S R V  
841 ctcaataagcttgaggagtttaagtatgacattgacctgcccaacaagaaggtctgcatt 900  
L N K L G G V K Y D I D L P N K K V C I  
901 gaatctgacagcagcagcactctgcttgcaacctgaagaaacaggaaagactggt 960  
E S E H S M D T L L A T L K K T G K T V  
961 tctactctggccttgagctcattcgtggcggatccggcggaaagcggcggatccggcgg 1020  
S Y L G L E L I R G G S G G S G G S G G  
1021 agcggcggatccggcggatccggcggcagcggcggatccggtggaagcgggt 1080  
S G G S G G S G G S G G S G G S G G S G  
1081 ggtaccgggtgtagcgggtggatccggtggaagcgggtggatccggtggttagcgggtggatcc 1140  
G S G G S G G S G G S G G S G G S G G S  
1141 ggggtccggcagtcagggcacatgcagttaccactctgattgccattgccggcatgacc 1200  
G G P R M Q G T C S T T L I A I A G M T  
1201 tbtgcatcctgtgtccattccattgaagcagatctcccaactggaaggggtgcagcaa 1260  
C A S C V H S I E G M I S Q L E G V Q Q  
1261 atatcgggtgtcttggcgaagggactgcaacagttctttataatccgctgtatattagc 1320  
I S V S L A E G T A T V L Y N P A V I S  
1321 ccagaagaactcagagctgctatagaagacatgggatttgaggcttcagttcctcggtaccc 1380  
P E E L R A A I E D M G F E A S V S V P  
1381 atgggttctaaagggcgaagaggacaatatggctatcatcaaagagttcatgctgttttaa 1440  
M V S K G E E D N M A I I K E F M R F K  
1441 gtacacatggaaggtccggttaacggtcacaggtttgaaatggaaggtgaggcgaaggt 1500  
V H M E G S V N G H E F E I E G E G E G  
1501 cgcccgtaagggcactcaaacggcgaagctgaaagtgaccaaagggtggccactgcgg 1560  
R P Y E G T Q T A K L K V T K G G P L P  
1561 ttccgttgggacattctgtcccgcgaattcatgtacggttctaaagcgtacgtgaaacac 1620  
F A W D I L S P Q F M Y G S K A Y V K H  
1621 ccggcggatattccggattacctgaaactgtcttcccgaaggtttcaaatgggaactg 1680  
P A D I P D Y L K L S F P E G F K W E R  
1681 gttatgaacttcgaagacgggtggtgtgtaacgggtactcaggactctagcctgcaggac 1740  
V M N F E D G G V V T V T Q D S S L Q D  
1741 ggcgaatttatctataaagtaaaactgattggtaactaactcccgtctgatggcgggtt 1800  
G E F I Y K V K L I G T N F P S D G P V  
1801 atgcaaaagaaaactatgggttgggaagcttctagcgaacgcatgtaccggaggacggt 1860  
M Q K K T M G W E A S S E R M Y P E D G  
1861 gcctgaaaaggtgaaatcaaacacgcctgaaactgaaggcggcggcactacgatgcg 1920  
A L K G E I K Q R L K L K D G G H Y D A  
1921 gaagtgaaaaccacgtacaagcgaagaaccagtagcgtgctggtgctacaatgtg 1980  
E V K T T Y K A K K P V Q L P G A Y N V  
1981 aatatcaaaactgatatccctcccataacgaagactataccatcgtcgaacagtagtaa 2040  
N I K L D I T S H N E D Y T I V E Q Y E  
2041 cgtgctgaaagtcgcatagcaccgggtggcatggatgagttatacaagcttagcgggtctg 2100  
R A E G R H S T G G M D E L Y K S S G L  
2101 gttccacggtagccactgggtcccacccgagttcgagaaataa  
V P R G S H W S H P Q F E K -

**Supporting Figure 3.** Nucleotide and amino acid sequence of the redCALWY-1 ORF in bacterial expression vector pET28a. The DNA sequence is shown in lowercase, with the single letter amino acid code shown beneath each codon in uppercase. The His-tag

is highlighted in dark yellow, the two thrombin cleavage sites (at the N- and at the C-terminus) in green, mOrange in yellow, the ATOX1 domain in turquoise, the linker in bright green, the WD4 domain in dark blue, mCherry in red, and the Strep-II tag in black. Reversion R125I is highlighted in grey in both the mOrange and mCherry sequences. Finally, the third cysteine residue located in WD4, mutated to serine in redCALWY-4, is highlighted in dark red.

```
1 atgattacaaggatgacgacgataagcgggccgcgatggtttctaaaggcgaggagaat 60
  M D Y K D D D D K A A A M V S K G E E N
61 aatatggcaatcattaaagagtttatgagattcaaggtcagaatggaaggaagcgtgaat 120
  N M A I I K E F M R F K V R M E G S V N
```

|      |                                                                   |      |
|------|-------------------------------------------------------------------|------|
| 121  | ggatcatgagttcgaattgaaggcgagggcgaggggaaggccttatgaggggtttcaaaca     | 180  |
|      | G H E F E I E G E G E G R P Y E G F Q T                           |      |
| 181  | gcaaaactcaaggttactaaaggcgggcccttccatttgctgggatataactgtctccg       | 240  |
|      | A K L K V T K G G P L P F A W D I L S P                           |      |
| 241  | cacttcacctatggatctaaggcttacgtgaaacacctgcgatattccagattat           | 300  |
|      | H F T Y G S K A Y V K H P A D I P D Y F                           |      |
| 301  | aaactgtccttccccgaagggttcaagtgaggagagagtaataactatgaggacggcggc      | 360  |
|      | K L S F P E G F K W E R V M N Y E D G G                           |      |
| 361  | gttgtgacagttactcaggattcatcgttacaggatggggagttcatctataaagtaaaa      | 420  |
|      | V V T V T Q D S S L Q D G E F I Y K V K                           |      |
| 421  | ctgattggtacgaattttccctcagatggacctgtcatgcagaagaagaccatgggtgg       | 480  |
|      | L I G T N F P S D G P V M Q K K T M G W                           |      |
| 481  | gaggcaagttcagagaatgtacccgaggacggcgcgctaaagggtaaaatcaagatg         | 540  |
|      | E A S S E R M Y P E D G A L K G K I K M                           |      |
| 541  | aggctgaagctcaaggacggcggcattacactttctgaagtaaaaacaacttataaggct      | 600  |
|      | R L K L K D G G H Y T S E V K T T Y K A                           |      |
| 601  | aaaaaacagtgcaattaccagggccttacatagtgacatcaagctcgacatcacaagc        | 660  |
|      | K K P V Q L P G A Y I V D I K L D I T S                           |      |
| 661  | cataatgaggactacactattgtggagcagatgagcgtgctgaaggtcgccacagtaga       | 720  |
|      | H N E D Y T I V E Q Y E R A E G R H S T                           |      |
| 721  | ggaggatggacgaactgtacaagtcgggaatgcccgaagcagagttctctgtggacatg       | 780  |
|      | G G M D E L Y K S G M P K H E F S V D M                           |      |
| 781  | acctgtggaggctgtgctgaagctgtctctcgggtcctcaataagcttgaggagttaa        | 840  |
|      | T C G G C A E A V S R V L N K L G G V K                           |      |
| 841  | tatgacattgacctgcccaacaagaaggtctgcattgaaatctgagcacagatggacact      | 900  |
|      | Y D I D L P N K K V C I E S E H S M D T                           |      |
| 901  | ctgcttgaaccctgaagaaacaggaagactgttctcacttggccttgagctcatt           | 960  |
|      | L L A T L K K T G K T V S Y L G L E L I                           |      |
| 961  | cgtggcggatccggcgggaagcggcggatccggcggtagcggcggatccggcggctccggc     | 1020 |
|      | R G G S G G S G G S G G S G G S G G S G G S G                     |      |
| 1021 | ggatccggcggcagcggcggatccgggtggaagcgggtggatccgggtggtagcgggtggatcc  | 1080 |
|      | G S G G S G G S G G S G G S G G S G G S G G S                     |      |
| 1081 | gggtggaagcgggtggatccgggtggtagcgggtggatccgggggtccggcggatgcagggcaca | 1140 |
|      | G G S G G S G G S G G S G G S G P R M Q G T                       |      |
| 1141 | tgcagtaccactctgattgccattgccggcatgacctgtgcatccagttgcattccatt       | 1200 |
|      | C S T T L I A I A G M T C A S S V H S I                           |      |
| 1201 | gaagcagtgatctcccaactggaaggggtgcagcaaatatcgggtgtcttggccgaaggg      | 1260 |
|      | E G M I S Q L E G V Q Q I S V S L A E G                           |      |
| 1261 | actgcaacagttctttataatcccgtgttaattagcccagaagaactcagagctgtata       | 1320 |
|      | T A T V L Y N P A V I S P E E L R A A I                           |      |
| 1321 | gaagacatgggatttgaggcttcagctcggtagccatggtagcaaggggtgaagaagac       | 1380 |
|      | E D M G F E A S V S V P M V S K G E E D                           |      |
| 1381 | aactggccattatataagaattcatgcgcttaaggtgcataatggaaggggtccgtgaat      | 1440 |
|      | N M A I I K E F M R F K V H M E G S V N                           |      |
| 1441 | gggcaagcaattcgaatagagggagaaggggaaggaagcggccttacgagggaaccagaca     | 1500 |
|      | G H E F E I E G E G E G R P Y E G T Q T                           |      |
| 1501 | gcaaaactcaaggttactaaaggcgggcccttccatttgctgggatataactgtctccg       | 1560 |
|      | A K L K V T K G G P L P F A W D I L S P                           |      |
| 1561 | cagttcatgtagcagcagcaagcttacgtgaagcaccgccagacatcccggattactta       | 1620 |
|      | Q F M Y G S K A Y V K H P A D I P D Y L                           |      |
| 1621 | aaactgagtttccctgaaggttcaagtgaggcggcgtgatgaacttgaagatggagga        | 1680 |
|      | K L S F P E G F K W E R V M N F E D G G                           |      |
| 1681 | gtcgtgacagctcaccagcaggttcatccctccaagacggcaggtttatatacaaggtgaag    | 1740 |
|      | V V T V T Q D S S L Q D G E F I Y K V K                           |      |
| 1741 | cttatcggcacaactttccaagcagcggcccgctgatgcaaaaaagaccatgggctgg        | 1800 |
|      | L I G T N F P S D G P V M Q K K T M G W                           |      |
| 1801 | gaagcaagcagtgaaacgaatgtaccagaggatgggtgcgtgaagggagaaataaaacag      | 1860 |
|      | E A S S E R M Y P E D G A L K G E I K Q                           |      |
| 1861 | agactaaaactgaaagcggggacactacgacggcaggtgaagacgacatacaaaagcg        | 1920 |
|      | R L K L K D G G H Y D A E V K T T Y K A                           |      |
| 1921 | aagaagcccgctccagctgcctggcgcctataatgtgaatatcaaaactggacatcacctcc    | 1980 |
|      | K K P V Q L P G A Y N V N I K L D I T S                           |      |
| 1981 | cacaacgaggactacacaatagtggaacagtagagcagcogaaggaagggcattccacc       | 2040 |
|      | H N E D Y T I V E Q Y E R A E G R H S T                           |      |
| 2041 | ggggcagtgatgagttatataaaataa                                       |      |
|      | G G M D E L Y K -                                                 |      |

**Supporting Figure 4.** Nucleotide and amino acid sequence of the redCALWY-4 ORF in mammalian expression vector pGen2.1.

The DNA sequence is shown in lowercase, with the single letter amino acid code shown beneath each codon in uppercase. The

FLAG-tag is highlighted in dark yellow, mOrange2 in yellow, the ATOX1 domain in turquoise, the linker in bright green, the WD4

domain in dark blue and mCherry in red. Reversion R125I is highlighted in grey in both the mOrange and mCherry sequences. Finally, redCALWY-4's cysteine to serine mutation in WD4 is highlighted in dark red.

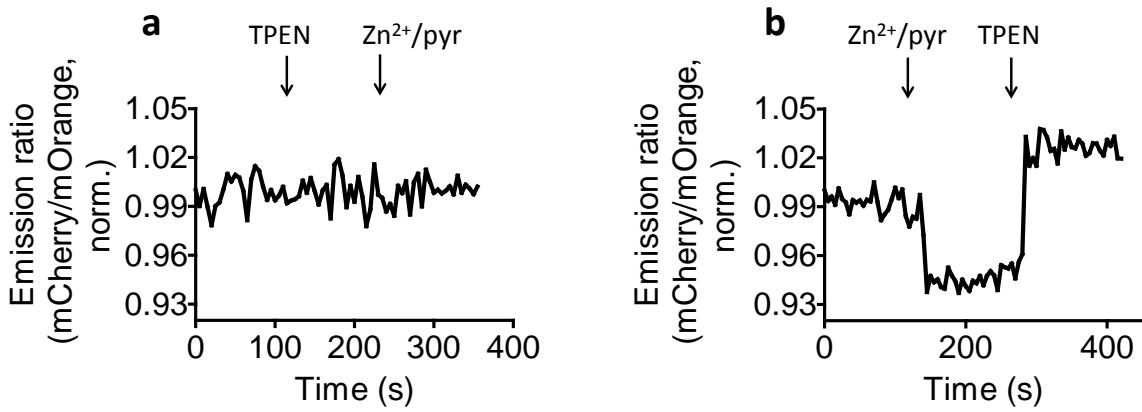

**Supporting Figure 5.** Additional redCALWY measurements in HeLa cells. (a) HeLa cell transfected with redCALWY-4 with wild-type mOrange and mCherry domains (lacking the R125I mutations) were exposed first to 50  $\mu\text{M}$  TPEN followed by 100  $\mu\text{M}$  ZnCl<sub>2</sub> and 10  $\mu\text{M}$  pyrithione. (b) HeLa cell transfected with redCALWY-4 were exposed first to 10  $\mu\text{M}$  ZnCl<sub>2</sub> and 1  $\mu\text{M}$  pyrithione, followed by 50  $\mu\text{M}$  TPEN.

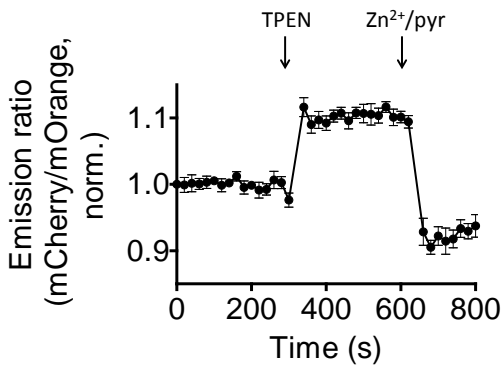

**Supporting Figure 6.** Response of redCALWY-4 in HEK293 cells. Cells transfected with redCALWY-4 were exposed first to 50  $\mu\text{M}$  TPEN, followed by 100  $\mu\text{M}$  ZnCl<sub>2</sub> and 5  $\mu\text{M}$  pyrithione. The trace represents the average of four cells after normalization of the emission ratio at  $t=0$ . Error bars represent SEM.

## Supporting references

1. Quan, J., and Tian, J. (2009) Circular polymerase extension cloning of complex gene libraries and pathways, *PLoS One* 4, e6441.
2. Liu, H., and Naismith, J. H. (2008) An efficient one-step site-directed deletion, insertion, single and multiple-site plasmid mutagenesis protocol, *BMC Biotechnol.* 8, 91.
3. Shcherbakova, D. M., Hink, M. A., Joosen, L., Gadella, T. W., and Verkhusha, V. V. (2012) An orange fluorescent protein with a large Stokes shift for single-excitation multicolor FCCS and FRET imaging, *J. Am. Chem. Soc.* 134, 7913-7923.
4. Vinkenborg, J. L., Nicolson, T. J., Bellomo, E. A., Koay, M. S., Rutter, G. A., and Merkx, M. (2009) Genetically encoded FRET sensors to monitor intracellular Zn<sup>2+</sup> homeostasis, *Nat. Methods* 6, 737-740.
5. Evers, T. H., Appelhof, M. A., Meijer, E. W., and Merkx, M. (2008) His-tags as Zn(II) binding motifs in a protein-based fluorescent sensor, *Protein Eng. Des. Sel.* 21, 529-536.
6. Wernimont, A. K., Yatsunyk, L. A., and Rosenzweig, A. C. (2004) Binding of copper(I) by the Wilson disease protein and its copper chaperone, *J. Biol. Chem.* 279, 12269-12276.
